# Supplementary material
Source: PubMed Central journal article supplement (PMC2630058)
Supplement: 0811897106_0811897106SI.pdf [file 0811897106_0811897106SI.pdf]

# Supporting Information

Chung *et al.* 10.1073/pnas.0811897106

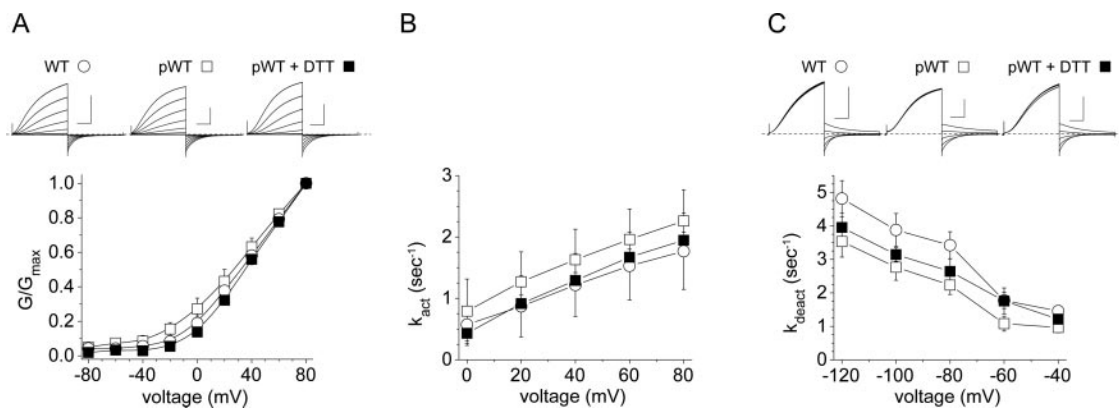

**Fig. S1.** Comparison of the functions of WT  $I_{K5}$  and pWT  $I_{K5}$ . (A) Isochronal (2-s conditioning pulses)  $G/G_{max}$  as a function of voltage for WT ( $n = 4$ , open circles), pWT ( $n = 5$ , open squares), and pWT + DTT ( $n = 4$ , closed squares). (B) Rate constants of activation ( $k_{act}$ ) for WT, pWT, and pWT + DTT. (C) Rate constants of deactivation ( $k_{deact}$ ) for WT ( $n = 5$ ), pWT ( $n = 6$ ), and pWT + DTT ( $n = 4$ ). For current traces, vertical scale is 200 pA/pF and horizontal scale is 0.5 s. Dotted line indicates zero current.

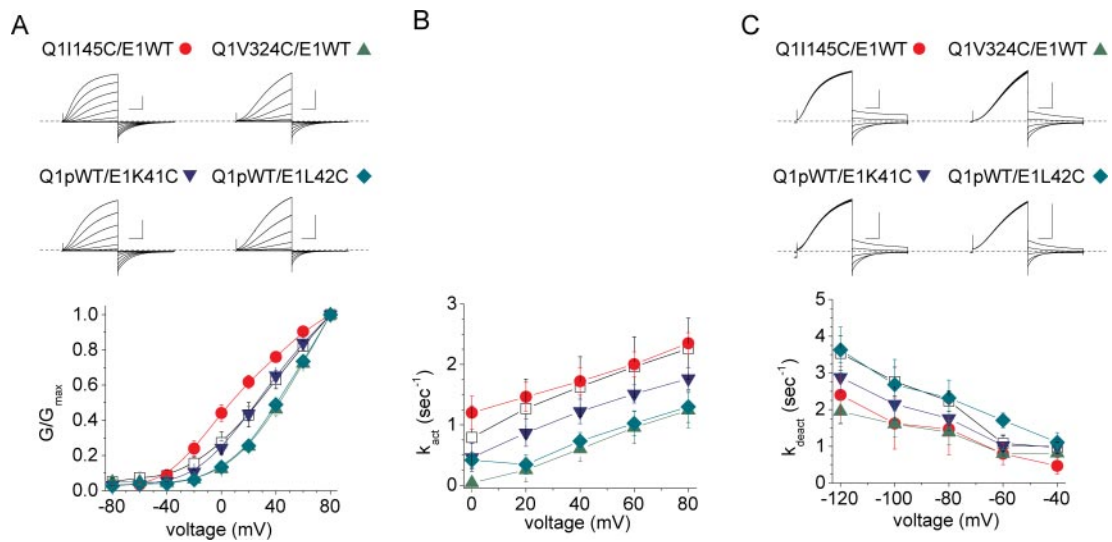

**Fig. S2.** Single-sided Cys mutant  $I_{K5}$ . (A) Dependence of isochronal  $G/G_{max}$  on voltage and (B)  $k_{act}$  for pWT (open squares), Q1 1145C/E1 WT ( $n = 4$ , red circles), Q1 V324C/E1WT ( $n = 5$ , green triangles), Q1 pWT/E1 K41C ( $n = 4$ , blue triangles), and Q1 pWT/E1 L42C ( $n = 5$ , blue-green diamonds). (C)  $k_{deact}$  for pWT, Q1 1145C/E1 WT ( $n = 6$ ), Q1 V324C/E1WT ( $n = 4$ ), Q1 pWT/E1 K41C ( $n = 4$ ), and Q1 pWT/E1 L42C ( $n = 5$ ). For current traces, vertical scale is 200 pA/pF and horizontal scale is 0.5 s. Dotted line indicates zero current.

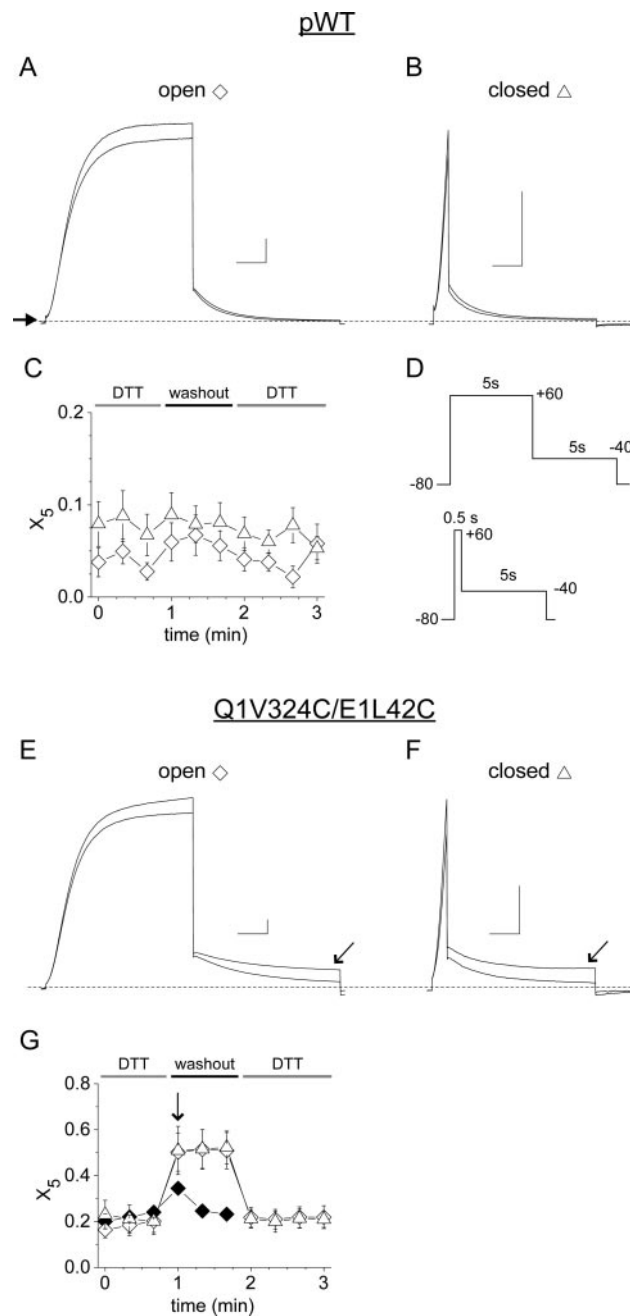

**Fig. S3.** State-dependence of Q1 V324C/E1 L42C cross-link. (A–C): pWT; (E–G): Q1 V324C/E1 L42C. (D): Pulse protocol; upper, open; lower, closed. (A and E): Open protocol current traces. (B and F): closed protocol current traces. The first and fourth current traces (arrows) are shown. (C and G): fraction of channels open after 5 seconds of repolarization at  $-40$  mV (designated  $X_5$ ) vs. time. Cells were preincubated in 10 mM DTT for a minimum of 15 min. Washout and re-application of DTT solution were added at the beginning of the depolarization for the open state protocol or 5 sec before the subsequent depolarization for the closed state protocol. Start-to-start pulse interval was 20 sec. (G) Filled diamonds indicate the open state protocol with 2 mM NEM in the washout solution. Solution change at arrow. For current traces, vertical scale is 50 pA/pF and horizontal scale is 0.5 s. Dotted line indicates zero current.

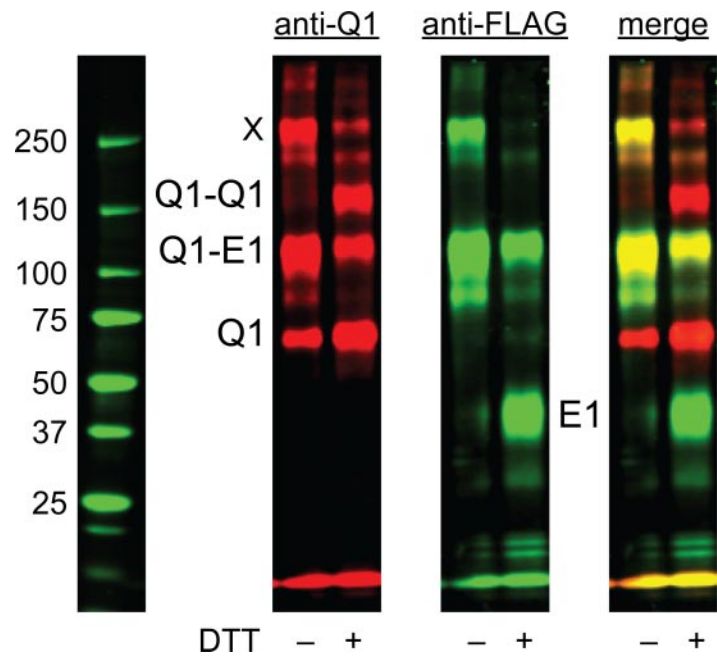

**Fig. S4.** Full-length blots of Q1 T144C/E1 G40C. Q1 (Q1) is represented as a red signal and E1 as a green signal. The merged red and green in the cross-linked Q1-E1 (Q1E1) band is yellow. The samples in the right lanes were reduced with DTT in sample buffer. X indicates a band of molecular weight greater than 250 kDa, possibly containing approximately two Q1s per E1. The molecular weights of the markers are in kDa.

**Table S1. Activation and deactivation parameters for  $I_{KS}$  channels used in study**

|                | $V_{1/2}$   |            | $k_{act}$ at + 60 mV |                | $k_{deact}$ at -40 mV |                |
|----------------|-------------|------------|----------------------|----------------|-----------------------|----------------|
|                | -DTT, mV    | +DTT, mV   | -DTT, $s^{-1}$       | +DTT, $s^{-1}$ | -DTT, $s^{-1}$        | +DTT, $s^{-1}$ |
| WT             | 29 ± 8 (4)  |            | 1.4 ± 0.5 (4)        |                | 1.4 ± 0.4 (5)         |                |
| pWT            | 23 ± 13 (6) | 34 ± 4 (4) | 1.7 ± 0.5 (5)        | 1.7 ± 0.1 (4)  | 0.9 ± 0.3 (6)         | 1.2 ± 0.2 (4)  |
| Q11145C/E1K41C | 8 ± 8 (5)   | 1 ± 12 (5) | 2.2 ± 1.0 (5)        | 2.2 ± 0.6 (5)  | 0.03 ± 0.04 (6)       | 0.8 ± 0.4 (6)  |
| Q11145C/E1L42C | 26 ± 6 (7)  | 23 ± 7 (4) | 1.3 ± 0.2 (7)        | 1.5 ± 0.3 (4)  | 3.1 ± 0.7 (6)         | 0.7 ± 0.2 (6)  |
| Q1V324C/E1K41C | 38 ± 3 (5)  | 24 ± 7 (4) | 1.0 ± 0.2 (5)        | 1.7 ± 0.3 (4)  | 1.1 ± 0.2 (6)         | 0.9 ± 0.2 (6)  |
| Q1V324C/E1L42C | n/a         | 39 ± 4 (4) | n/a                  | 1.4 ± 0.2 (4)  | 0.000 ± 0.007 (3)     | 0.7 ± 0.1 (5)  |
| Q11145C/E1WT   | 8 ± 8 (4)   |            | 2.0 ± 0.2 (4)        |                | 0.5 ± 0.2 (6)         |                |
| Q1V324C/E1WT   | 40 ± 4 (5)  |            | 1.0 ± 0.3 (5)        |                | 0.81 ± 0.06 (4)       |                |
| Q1pWT/E1K41C   | 24 ± 6 (4)  |            | 1.5 ± 0.2 (4)        |                | 1.0 ± 0.2 (4)         |                |
| Q1pWT/E1L42C   | 38 ± 4 (4)  |            | 1.0 ± 0.2 (4)        |                | 1.1 ± 0.3 (5)         |                |

-DTT: channel properties of cells that were not treated with 10 mM DTT. +DTT: channel properties of cells pretreated with 10 mM DTT for at least 15 min and in the continued presence of DTT.
